# Supplementary material for: Stereochemical Geometries and Photoluminescence in Pseudo-Halido-Zinc(II) Complexes. Structural Comparison between the Corresponding Cadmium(II) Analogs
Source: MDPI journal article supplement (doi:10.3390/inorganics9070053), 2021-07-09
Supplement: s1 [file s1]

# Supplementary Materials

## Stereochemical Geometries and Photoluminescence in Pseudo-Halido-Zinc(II) Complexes. Structural Comparison between the Corresponding Cadmium(II) Analogs

Franz A. Mautner <sup>1,\*</sup>, Roland C. Fischer <sup>2</sup>, Ana Torvisco <sup>2</sup>, Nahed M. H. Salem <sup>3</sup>, Amber R. Dugas <sup>4</sup>, Shelby F. Aaron <sup>4</sup>, Sushant P. Sahu <sup>4</sup>, Febbe R. Louka <sup>4</sup> and Salah S. Massoud <sup>3,4,\*</sup>

<sup>1</sup> Institut für Physikalische and Theoretische Chemie, Technische Universität Graz, A-8010 Graz, Austria

<sup>2</sup> Institut für Anorganische Chemie, Technische Universität Graz, Stremayrgasse 9/V, A-8010 Graz, Austria;  
roland.fischer@tugraz.at (R.C.F.); ana.torviscogomez@tugraz.at (A.T.)

<sup>3</sup> Department of Chemistry, Faculty of Science, Alexandria University, Moharam Bey, Alexandria 21511, Egypt; nahed\_s@yahoo.com

<sup>4</sup> Department of Chemistry, University of Louisiana at Lafayette, P.O. Box 43700, Lafayette, LA 70504, USA;

amber.dugas2@louisiana.edu (A.R.D.); shelby.aaron1@louisiana.edu (S.F.A.);  
sushant.sahu@louisiana.edu (S.P.S.); febee.louka@louisiana.edu (F.R.L.)

\* Correspondence: mautner@tugraz.at (F.A.M.); ssmassoud@louisiana.edu (S.S.M.);  
Tel.: +43-316-4873-8234 (F.A.M.); +1-337-482-5672 (S.S.M.);  
Fax: +43-316-4873-8225 (F.A.M.); +1-337-482-5676 (S.S.M.)

### Contents

| Title                                                                                                                                               | Page number |
|-----------------------------------------------------------------------------------------------------------------------------------------------------|-------------|
| Preparation of Nitrate Complexes                                                                                                                    | 2           |
| Figure S1. Packing plots of <b>3</b> .                                                                                                              | 3           |
| Figure S2. Packing plots of <b>4</b> .                                                                                                              | 3           |
| Figure S3. Packing plot of <b>5</b> .                                                                                                               | 4           |
| Figure S4. Packing plot of <b>6a</b> .                                                                                                              | 4           |
| Figure S5. Packing plot of <b>7</b> .                                                                                                               | 5           |
| Figure S6. Packing plot of <b>8</b> .                                                                                                               | 5           |
| Figure S7. Fluorescence and UV-Vis. spectra of the dicyanamido Zn(II) complexes <b>2</b> , <b>5</b> , <b>6</b> , <b>7</b> and <b>8</b> in methanol. | 6           |
| Table S1. Selected bond distances (Å) and bond angles (°) of <b>3</b> , <b>4</b> , <b>5</b> , <b>6a</b> , <b>7</b> and <b>8</b> .                   | 7           |
| Table S2. Possible hydrogen bonds.                                                                                                                  | 10          |
| Table S3. Ring...ring interactions in <b>7</b> .                                                                                                    | 11          |

### *Preparation of Nitrate Complexes*

#### **[Zn(NTB)(N<sub>3</sub>)]NO<sub>3</sub> (3a)**

Sodium azide (0.065 g, 1.0 mmol) dissolved in H<sub>2</sub>O (5 mL) was added to a mixture containing tris(2-benzimidazolyl)amine monohydrate, NTP (0.213 g, 0.50 mmol) and Zn(NO<sub>3</sub>)<sub>2</sub>·6H<sub>2</sub>O (0.150 g, 0.5 mmol) dissolved in MeOH (15 mL). The resulting solution was heated for 10 min on a steam-bath, filtered through celite, and then allowed to crystallize at room temperature. After one day, the compound which separated was collected by filtration and recrystallized from CH<sub>3</sub>CN to afford colorless tiny, long needles (yield: 0.225 g, 78%). Characterization: Anal. Calcd. (C<sub>24</sub>H<sub>21</sub>N<sub>11</sub>O<sub>3</sub>Zn, MM = 576.89 g/mol): C, 49.97; H, 3.67; N, 26.71%. Found: C, 49.74; H, 3.59; N, 26.27. IR bands (ATR, cm<sup>-1</sup>): 3173 (vw) ν(N-H); 3106 (vw), 3047 (vw), 2974 (vw), 2900 (vw), 2844 (vw) ν(C-H); 2063 (vs), 2029 (m) ν(N<sub>3</sub><sup>-</sup>); 1625 (m), 1596, 1540 (m), 1474 (m), 1454 (s), 1389 (m), 1343 (m) ν(C=C and C=N); 1277 (s), 1041 (s), 966 (s), 915 (m), 750 (vs). UV (MeOH) λ<sub>max</sub>, nm (ε<sub>max</sub>, M<sup>-1</sup>cm<sup>-1</sup>): ~243 (1.27 × 10<sup>4</sup>, b), 263 (1.50 × 10<sup>4</sup>), 271 (1.50 × 10<sup>4</sup>), 278 (1.26 × 10<sup>4</sup>), 286 (sh). Molar conductivity, Λ<sub>M</sub> (MeOH) = 141 Ω<sup>-1</sup>·cm<sup>2</sup>·mol<sup>-1</sup>.

#### **[Zn(TPA)(NCS)]NO<sub>3</sub>·½H<sub>2</sub>O (4c)**

Ammonium thiocyanate (0.076 g, 1.0 mmol) was added to a mixture containing tris(2-aminomethylpyridine)amine, TPA (0.146 g, 0.50 mmol) and Zn(NO<sub>3</sub>)<sub>2</sub>·6H<sub>2</sub>O (0.150 g, 0.5 mmol) dissolved in MeOH (15 mL). The resulting clear solution was heated for 10 min on a steam-bath, filtered and then allowed to crystallize at room temperature. After 3 days, the compound which separated was collected by filtration and recrystallized from EtOH to afford colorless single crystals of X-ray quality (yield: 0.185 g, 76%). Characterization: Anal. Calcd: C<sub>19</sub>H<sub>19</sub>N<sub>6</sub>O<sub>3.5</sub>SZn (484.85 g/mol): C, 47.07; H, 3.95; N, 17.33%. Found: C, 46.89, H, 3.95; N, 17.53%. IR bands (ATR, cm<sup>-1</sup>): ~3500 (vw, b) ν(O-H); 3056 (vw), 2905 (vw) ν(C-H); 2064 (vs) (C≡N, NCS<sup>-</sup>); 1603 (s), 1574 (m), 1480 (m), 1437 (s)

$\nu(\text{C}=\text{C}$  and  $\text{C}=\text{N})$ ; 1573 (m), 1480 (m), 1437 (s); 1288 (m), 1152 (m), 1050 (m), 1019 (m), 908 (m), 827 (m), 756 (vs). UV (MeOH)  $\lambda_{\text{max}}$ , nm ( $\epsilon_{\text{max}}$ ,  $\text{M}^{-1}\text{cm}^{-1}$ ): ~264, 270, 291, 297, 304, 309, 317. Molar conductivity,  $\Lambda_{\text{M}}$  (MeOH) =  $151 \Omega^{-1}\cdot\text{cm}^2\cdot\text{mol}^{-1}$ .

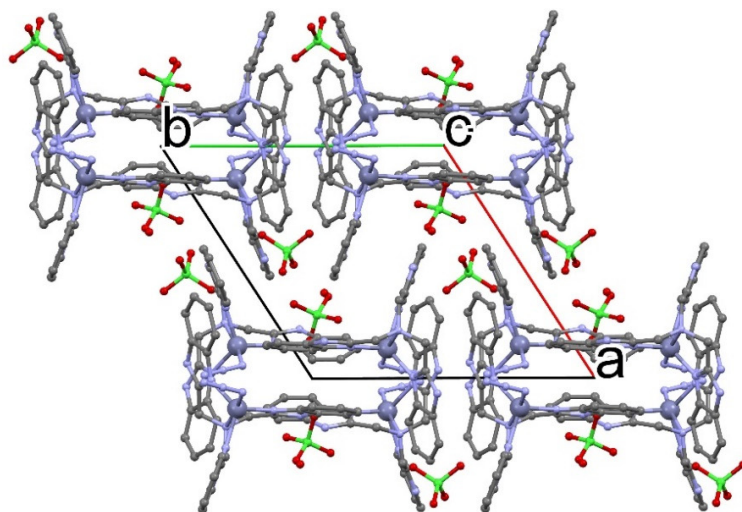

**Figure S1.** Packing plot of 3.

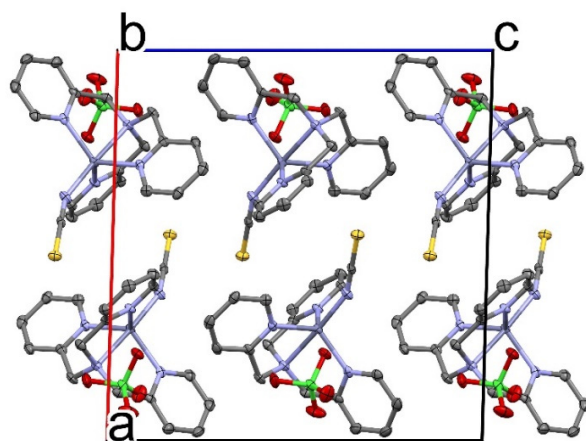

**Figure S2.** Packing plot of 4.

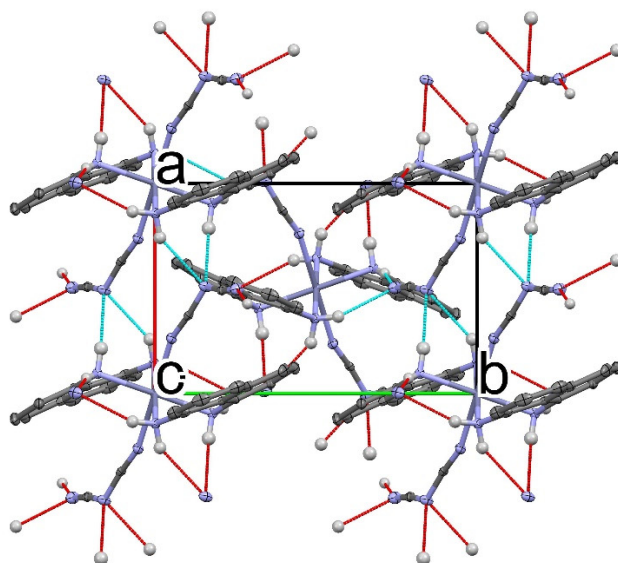

**Figure S3.** Packing plot of **5**. Broken lines indicate hydrogen bonds.

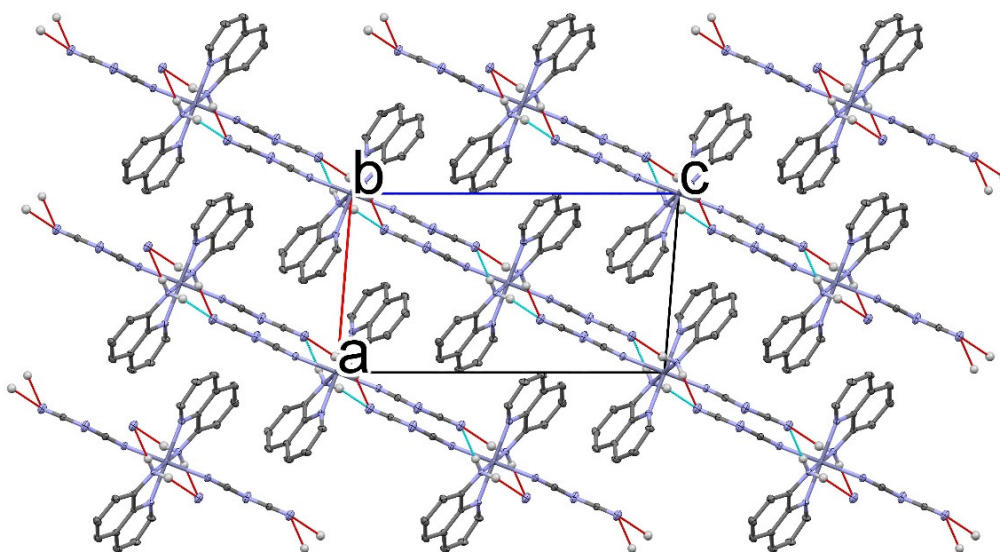

**Figure S4.** Packing plot of **6a**. Broken lines indicate hydrogen bonds.

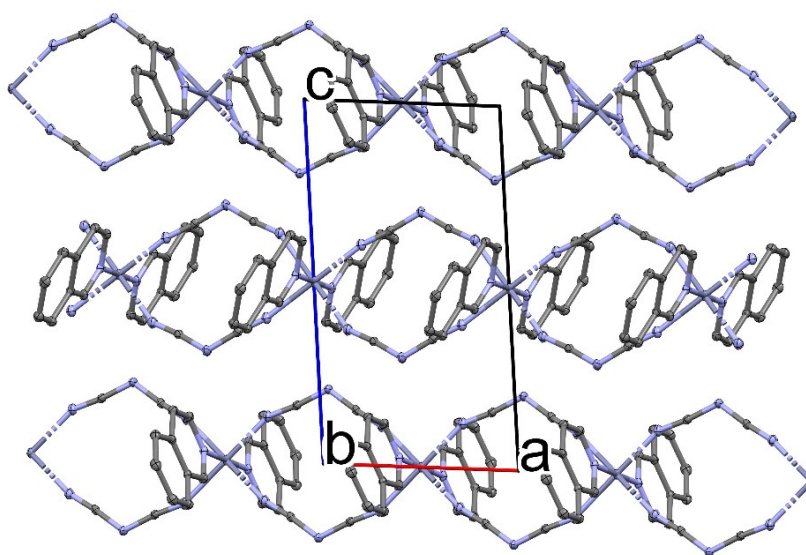

Figure S5. Packing plot of 7.

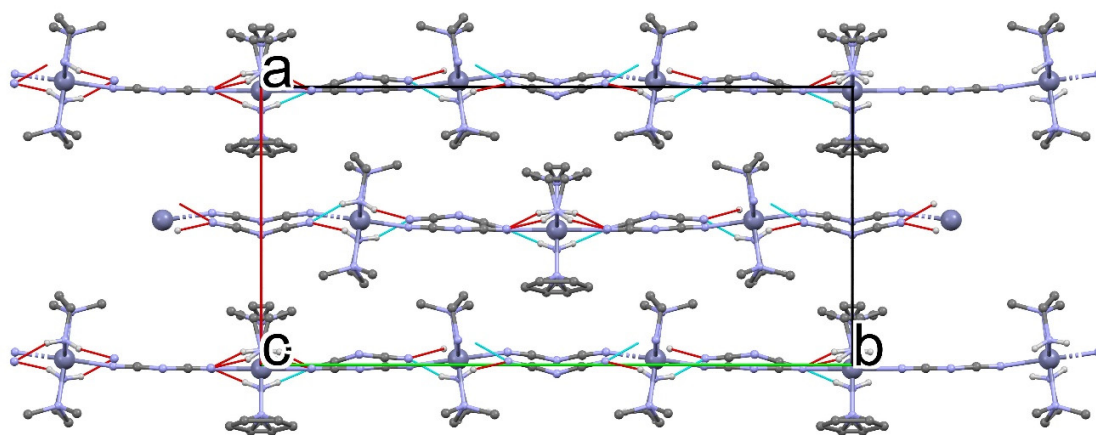

Figure S6. Packing plot of 8.

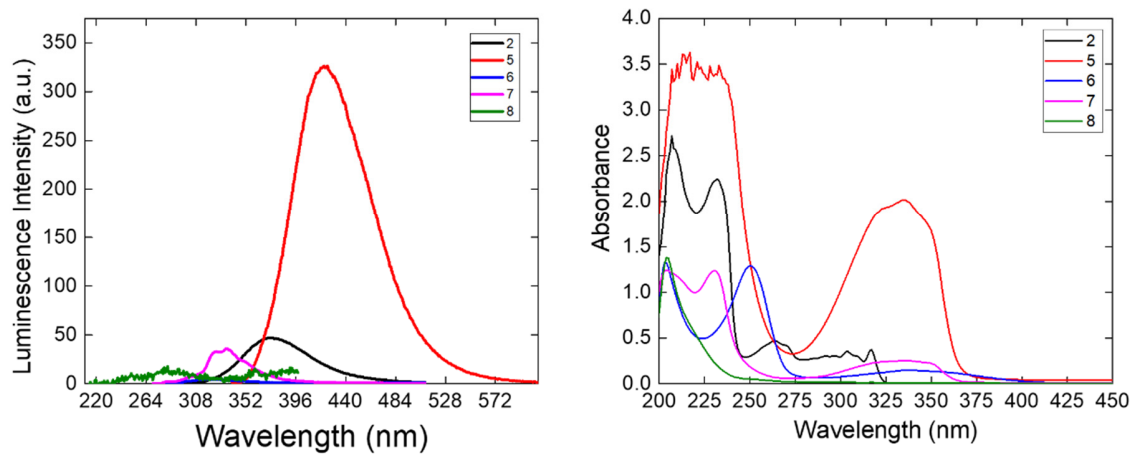

**Figure S7.** Left: Fluorescence and Right: UV-Vis. absorption spectra of the dicyanamido Zn(II) complexes **2**, **5**, **6**, **7** and **8** in methanol.

**Table S1.** Selected bond distances (Å) and bond angles (°) of **3**, **4**, **5**, **6a**, **7** and **8**.

|                    |            |             |            |
|--------------------|------------|-------------|------------|
| <b>Compound 3</b>  |            |             |            |
| Zn1-N1             | 2.020(5)   | Zn2-N11     | 2.019(5)   |
| Zn1-N4             | 2.491(5)   | Zn2-N14     | 2.489(5)   |
| Zn1-N5             | 2.043(5)   | Zn2-N15     | 2.034(5)   |
| Zn1-N7             | 2.013(5)   | Zn2-N17     | 2.002(5)   |
| Zn1-N9             | 2.013(5)   | Zn2-N19     | 2.038(5)   |
| N1-N2              | 1.193(8)   | N11-N12     | 1.206(8)   |
| N2-N3              | 1.158(8)   | N12-N13     | 1.171(8)   |
| N1-Zn1-N4          | 174.4(2)   | N11-Zn2-N14 | 173.0(2)   |
| N9-Zn1-N5          | 122.3(2)   | N19-Zn2-N15 | 123.3(2)   |
| N7-Zn1-N5          | 112.0(2)   | N17-Zn2-N15 | 110.3(2)   |
| N7-Zn1-N9          | 106.1(2)   | N17-Zn2-N19 | 108.5(2)   |
| Zn1-N1-N2          | 119.9(4)   | Zn2-N11-N12 | 120.7(4)   |
| N1-N2-N3           | 178.5(6)   | N11-N12-N13 | 177.6(7)   |
| <b>Compound 4</b>  |            |             |            |
| Zn1-N1             | 2.006(3)   | Zn1-N2      | 2.261(3)   |
| Zn1-N3             | 2.079(3)   | Zn1-N4      | 2.058(3)   |
| Zn1-N5             | 2.044(3)   | N1-C19      | 1.175(4)   |
| S1-C19             | 1.627(4)   |             |            |
| N1-Zn1-N2          | 175.26(12) | N3-Zn1-N4   | 115.27(11) |
| N3-Zn1-N5          | 107.47(11) | N4-Zn1-N5   | 124.32(11) |
| N1-Zn1-N3          | 98.53(11)  | Zn1-N1-C19  | 154.3(3)   |
| N1-C19-S1          | 178.8(3)   |             |            |
| <b>Compound 5</b>  |            |             |            |
| Zn1-N1             | 2.1620(14) | Zn1-N2      | 2.1199(15) |
| Zn1-N3             | 2.2179(14) | N3-C11      | 1.158(2)   |
| N4-C11             | 1.310(2)   | N4-C12      | 1.321(2)   |
| N5-C12             | 1.155(2)   |             |            |
| N1-Zn1-N2          | 80.25(6)   | N1-Zn1-N3   | 92.75(5)   |
| Zn1-N1-C1          | 117.41(11) | Zn1-N2-C7   | 114.89(11) |
| Zn1-N3-C11         | 161.72(14) | C11-N4-C12  | 121.66(16) |
| N3-C11-N4          | 173.05(18) | N5-C12-N4   | 172.85(19) |
| <b>Compound 6a</b> |            |             |            |
| Zn1-N1             | 2.1227(11) | Zn1-N2      | 2.1586(11) |
| Zn1-N3             | 2.2051(11) | N3-C10      | 1.1648(18) |
| N4-C11             | 1.3042(17) | N4-C10      | 1.3107(18) |
| N5-C11             | 1.1591(17) |             |            |

|                         |            |                         |            |
|-------------------------|------------|-------------------------|------------|
| N1-Zn1-N2               | 78.94(4)   | Zn1-N1-C6               | 109.08(8)  |
| Zn1-N2-C1               | 127.56(9)  | Zn1-N3-C10              | 147.31(10) |
| C10-N4-C11              | 122.26(12) | N3-C10-N4               | 173.71(14) |
| N5-C11-N4               | 171.69(14) |                         |            |
| Compound 7              |            |                         |            |
| Zn1-N1                  | 2.1369(17) | Zn2-N5                  | 2.1593(17) |
| Zn1-N2                  | 2.1675(17) | Zn2-N6                  | 2.1438(1)  |
| Zn1-N4                  | 2.1721(17) | Zn2-N8                  | 2.1735(17) |
| N2-C10                  | 1.159(2)   | N3-C10                  | 1.307(2)   |
| N3-C11                  | 1.313(2)   | N4-C11                  | 1.154(2)   |
| N1'-Zn1-N2              | 90.22(6)   | N1-Zn1-N4''             | 90.47(6)   |
| N2'-Zn1-N4''            | 90.27(7)   | N6*-Zn2-N5              | 90.31(6)   |
| N6*-Zn2-N8 <sup>+</sup> | 90.59(7)   | N5*-Zn2-N8 <sup>+</sup> | 90.24(6)   |
| Zn1-N2-C10              | 168.49(16) | C10-N3-C11              | 119.51(17) |
| Zn1-N4-C11              | 148.80(15) | C20-N5-C12              | 117.85(16) |
| Zn2-N5-C20              | 121.19(13) | Zn2-N5-C12              | 120.92(12) |
| Zn2-N6-C21              | 166.26(15) | C21-N7-C22              | 119.09(17) |
| Zn2-N8-C22              | 154.04(15) | N2-C10-N3               | 174.7(2)   |
| N4-C1-N3                | 174.6(2)   |                         |            |
| Compound 8              |            |                         |            |
| Zn1-N1                  | 2.278(3)   | Zn2-N5                  | 2.263(3)   |
| Zn1-N3                  | 2.246(3)   | Zn2-N5'                 | 2.263(3)   |
| Zn1-N11                 | 2.255(3)   | Zn2-N15                 | 2.067(5)   |
| Zn1-N12                 | 2.063(4)   | Zn2-N16                 | 2.258(4)   |
| Zn1-N13                 | 2.262(3)   | Zn2-N17                 | 2.107(5)   |
| Zn1-N14                 | 2.111(4)   | Zn2-N18                 | 2.239(4)   |
| C1-N1                   | 1.162(4)   | C1-N2                   | 1.302(4)   |
| C2-N3                   | 1.152(4)   | C3-N4                   | 1.296(4)   |
| C3-N5                   | 1.144(4)   | C2-N4                   | 1.298(4)   |
| C4-N6                   | 1.170(5)   | C4-N7                   | 1.296(4)   |
| C6-N10                  | 1.149(4)   | C6-N9                   | 1.313(4)   |
| C5-N8                   | 1.146(5)   | C5-N9                   | 1.312(4)   |
| N12-Zn1-N14             | 178.55(11) | N15-Zn2-N17             | 179.25(19) |
| N11-Zn1-N13             | 179.34(17) | N18-Zn2-N16             | 178.92(19) |
| N3-Zn1-N1               | 179.22(16) | N5-Zn2-N5'              | 177.66(18) |
| Zn1-N1-C1               | 158.5(3)   | Zn1-N3-C2               | 163.6(3)   |
| N1-C1-N2                | 172.2(4)   | N4-C3-N5                | 171.0(4)   |
| Zn2-N5-C3               | 162.4(3)   | N3-C2-N4                | 170.5(4)   |

|            |          |            |          |
|------------|----------|------------|----------|
| C1-N2-C1'' | 124.8(5) | C2-N4-C3   | 125.7(4) |
| N6-C4-N7   | 172.3(5) | N9-C6-N10  | 172.4(4) |
| N8-C5-N9   | 172.8(4) | C4-N7-C4'' | 120.9(5) |

Symmetry codes for 7: (') -x,-y,1-z; (") -x-1,-y,1-z; (\*) 1-x,1-y,-z; (+) -x,1-y,-z; (·) -1+x,y,z.

Symmetry codes for 8: (') x,1-y,z; (") x,2-y,z.

**Table S2.** Possible hydrogen bonds.

| D-H...A            | Symmetry code        | D...A (Å)  | D-H...A (°) |
|--------------------|----------------------|------------|-------------|
| <b>Compound 3</b>  |                      |            |             |
| O9-H9C..O3         |                      | 2.805(13)  | 162         |
| N6-H6..N3          | [2-x,1-y,1-z]        | 3.097(9)   | 145         |
| N8-H8..O6A         | [1-x,1-y,1-z]        | 2.808(10)  | 171         |
| N10-H10..O9        |                      | 2.709(10)  | 167         |
| N16-H16..O8A       | [1-x,1-y,1-z]        | 2.861(16)  | 164         |
| N18-H18..O8A       | [x,1+y,-1+z]         | 2.986(14)  | 152         |
| N20-H20A..N13      | [-x,1-y,z]           | 3.002(10)  | 152         |
| <b>Compound 5</b>  |                      |            |             |
| N1-H1A..N5         | [3/2-x,1/2+y,1/2-z]  | 3.147(2)   | 157         |
| N1-H1B..N4         | [-1+x,y,z]           | 3.217(2)   | 149         |
| N2-H2A..N4         | [-1+x,y,z]           | 3.080(2)   | 158         |
| N2-H2B..N5         | [-1/2+x,1/2-y,1/2+z] | 3.058(2)   | 163         |
| <b>Compound 6a</b> |                      |            |             |
| N1-H1A..N5         | [1/2+x,3/2-y,1/2+z]  | 3.0136(17) | 179         |
| N1-H1B..N5         | [1/2-x,1/2-y,1/2-z]  | 3.0204(16) | 168         |
| <b>Compound 8</b>  |                      |            |             |
| N12-H12A..N10      | [x,1-y,z]            | 3.058(5)   | 166         |
| N12-H12B..N6       | [x,y,-1+z]           | 3.105(5)   | 159         |
| N14_H14A..N10      | [x,1-y,1+z]          | 3.087(5)   | 158         |
| N14-H14B-N6        |                      | 2.990(5).  | 163         |
| N15-H15A..N8       |                      | 3.070(5)   | 163         |
| N15-H15B..N8       | [x,1-y,z]            | 3.070(5)   | 156         |
| N17-H17D..N8       | [x,y,1+z]            | 3.076(5)   | 171         |
| N17..H17E..N8      | [x,1-y,1+z]          | 3.076(5)   | 171         |

**Table S3. Ring··ring interactions in 7.**

|                                                                         |
|-------------------------------------------------------------------------|
| 6-Membered Ring ( 1) (N1, C1, C2, C7, C8, C9)                           |
| 6-Membered Ring ( 2) (C2, C3, C4, C5, C6, C7)                           |
| 10-Membered Ring ( 3) (N1, C1, C2, C3, C4, C5, C6, C7, C8, C9, C10)     |
| 6-Membered Ring ( 4) (N5, C12, C13, C14, C19, C20)                      |
| 6-Membered Ring ( 5) (C14, C15, C16, C17, C18, C19)                     |
| 10-Membered Ring ( 6) (N5, C12, C13, C14, C15, C16, C17, C18, C19, C20) |

---

Short Ring-Interactions with Cg-Cg Distances < 6 Ang., Alpha < 20 Deg., Beta < 60 Deg.

---

- Cg(I) = Plane number I (= ring number in () above)  
- Alpha = Dihedral Angle between Planes I and J (Deg)  
- Beta = Angle Cg(I)→Cg(J) or Cg(I)→Me vector and normal to plane I (Deg)  
- Gamma = Angle Cg(I)→Cg(J) vector and normal to plane J (Deg)  
- Cg-Cg = Distance between ring Centroids (Ang.)  
- CgI\_Perp = Perpendicular distance of Cg(I) on ring J (Ang.)  
- CgJ\_Perp = Perpendicular distance of Cg(J) on ring I (Ang.)  
- Slippage = Distance between Cg(I) and Perpend. Projection of Cg(J) on Ring I (Ang).

| Cg(I) Cg(J) [ARU(J)] | Cg-Cg      | Alpha    | Beta | Gamma | CgI_Perp  | CgJ_Perp  | Slippage |
|----------------------|------------|----------|------|-------|-----------|-----------|----------|
| Cg1 → Cg1 [2566]     | 4.505(2)   | 0.00(8)  | 39.6 | 39.6  | 3.4737(7) | 3.4737(7) | 2.869    |
| Cg1 → Cg1 [2666]     | 5.031(2)   | 0.00(8)  | 44.5 | 44.5  | 3.5879(7) | 3.5878(7) | 3.527    |
| Cg1 → Cg2 [2566]     | 3.7498(19) | 0.65(9)  | 21.6 | 22.0  | 3.4768(7) | 3.4858(9) | 1.382    |
| Cg1 → Cg2 [2666]     | 3.7763(19) | 0.65(9)  | 18.8 | 19.4  | 3.5619(7) | 3.5757(9) | 1.214    |
| Cg1 → Cg3 [2566]     | 3.9637(19) | 0.35(7)  | 28.6 | 28.6  | 3.4817(7) | 3.4806(6) | 1.896    |
| Cg1 → Cg3 [2666]     | 4.277(2)   | 0.35(7)  | 33.2 | 33.5  | 3.5678(7) | 3.5809(6) | 2.339    |
| Cg1 → Cg4 [1555]     | 5.925(3)   | 36.70(9) | 53.7 | 89.8  | 0.0209(7) | 3.5056(8) |          |
| Cg2 → Cg2 [2566]     | 4.438(2)   | 0.00(10) | 38.6 | 38.6  | 3.4672(9) | 3.4672(9) | 2.770    |
| Cg2 → Cg2 [2666]     | 3.883(2)   | 0.00(10) | 23.1 | 23.1  | 3.5716(9) | 3.5716(9) | 1.523    |
| Cg2 → Cg3 [2566]     | 3.9255(19) | 0.30(8)  | 27.8 | 27.5  | 3.4822(9) | 3.4728(6) | 1.830    |
| Cg2 → Cg3 [2666]     | 3.6296(18) | 0.30(8)  | 10.7 | 10.6  | 3.5673(9) | 3.5659(6) | 0.677    |
| Cg3 → Cg3 [2566]     | 3.7538(18) | 0.00(6)  | 21.9 | 21.9  | 3.4828(6) | 3.4828(6) | 1.401    |
| Cg3 → Cg3 [2666]     | 3.7737(18) | 0.00(6)  | 19.1 | 19.1  | 3.5667(6) | 3.5667(6) | 1.233    |
| Cg4 → Cg2 [2666]     | 5.869(3)   | 37.26(9) | 53.7 | 89.9  | 0.0071(8) | 3.4719(9) |          |
| Cg4 → Cg4 [2555]     | 4.587(2)   | 0.02(9)  | 40.1 | 40.1  | 3.5107(8) | 3.5107(8) | 2.952    |
| Cg4 → Cg4 [2655]     | 4.968(2)   | 0.02(9)  | 45.5 | 45.5  | 3.4828(8) | 3.4828(8) | 3.543    |
| Cg4 → Cg5 [2555]     | 3.7582(19) | 1.01(9)  | 20.8 | 21.8  | 3.4892(8) | 3.5125(9) | 1.336    |
| Cg4 → Cg5 [2655]     | 3.7455(19) | 1.01(9)  | 21.7 | 22.5  | 3.4611(8) | 3.4809(9) | 1.383    |
| Cg4 → Cg6 [2555]     | 4.0133(19) | 0.52(8)  | 28.9 | 29.3  | 3.5011(8) | 3.5119(6) | 1.942    |
| Cg4 → Cg6 [2655]     | 4.226(2)   | 0.52(8)  | 34.5 | 34.8  | 3.4705(8) | 3.4816(6) | 2.396    |
| Cg5 → Cg4 [2555]     | 3.7581(19) | 1.01(9)  | 21.8 | 20.8  | 3.5125(9) | 3.4891(8) | 1.396    |
| Cg5 → Cg4 [2655]     | 3.7456(19) | 1.01(9)  | 22.5 | 21.7  | 3.4809(9) | 3.4611(8) | 1.432    |
| Cg5 → Cg5 [2555]     | 4.372(2)   | 0.00(10) | 37.1 | 37.1  | 3.4865(9) | 3.4865(9) | 2.638    |
| Cg5 → Cg5 [2655]     | 3.909(2)   | 0.00(10) | 27.6 | 27.6  | 3.4638(9) | 3.4638(9) | 1.811    |
| Cg5 → Cg6 [2555]     | 3.8911(19) | 0.49(8)  | 26.3 | 25.9  | 3.5008(9) | 3.4881(6) | 1.725    |
| Cg5 → Cg6 [2655]     | 3.6270(18) | 0.49(8)  | 17.3 | 16.9  | 3.4708(9) | 3.4622(6) | 1.081    |
| Cg6 → Cg6 [2555]     | 3.7614(18) | 0.02(6)  | 21.4 | 21.4  | 3.5013(6) | 3.5012(6) | 1.375    |
| Cg6 → Cg6 [2655]     | 3.7434(18) | 0.02(6)  | 22.0 | 22.0  | 3.4704(6) | 3.4704(6) | 1.403    |

[2566] = -X,1-Y,1-Z  
 [2666] = 1-X,1-Y,1-Z  
 [1555] = X,Y,Z  
 [2555] = -X,-Y,-Z  
 [2655] = 1-X,-Y,-Z

Cg(I) refer to Ring Centre-of-Gravity numbers given in () in the Ring-Analysis above

| Cg(I) | x           | y           | z           |
|-------|-------------|-------------|-------------|
| Cg1   | 0.15000(9)  | 0.34427(8)  | 0.46940(6)  |
| Cg2   | 0.31703(11) | 0.59243(8)  | 0.54045(6)  |
| Cg3   | 0.23369(8)  | 0.46825(6)  | 0.50512(4)  |
| Cg4   | 0.31077(10) | 0.15613(7)  | 0.03752(6)  |
| Cg5   | 0.22093(11) | -0.09376(8) | -0.03165(6) |
| Cg6   | 0.26610(8)  | 0.03132(6)  | 0.00271(4)  |
